# Supplementary material
Source: publisher figshare collection journal article supplement (https://acs.figshare.com/ndownloader/files/3792475)
Supplement: Supplementary file 1 [file 3792475]

# Supporting Information

## 4,5-Cis Unsaturated $\alpha$ -GalCer Analogues Distinctly Lead to CD1d-Mediated Th1-Biased NKT Cell Responses

Yanli Cui,<sup>\*,†</sup> Zhiyuan Li,<sup>‡</sup> Zhaodong Cheng,<sup>†</sup> Chengfeng Xia,<sup>\*,‡</sup> and Yongmin Zhang<sup>\*,§,||</sup>

<sup>†</sup> Department of Chemistry, Zhejiang University, Hangzhou 310027, P R China

<sup>‡</sup> State Key Laboratory of Phytochemistry and Plant Resources in West China, Kunming Institute of Botany, Chinese Academy of Sciences, Kunming 650201, P R China

<sup>§</sup> Institut Parisien de Chimie Moléculaire, UMR CNRS 8232, Université Pierre et Marie Curie-Paris 6, 75005 Paris, France

<sup>||</sup> Institute for Interdisciplinary Research, Jiangnan University, Wuhan Economic and Technological Development Zone, Wuhan 430056, P R China

### Contents

|      |                                                                     |
|------|---------------------------------------------------------------------|
| S-1  | Contents                                                            |
| S-2  | The synthetic procedures of compound <b>5</b> and compound <b>6</b> |
| S-3  | Figure S1. NMR Spectra of compound <b>10</b>                        |
| S-4  | Figure S2. NMR Spectra of compound <b>11</b>                        |
| S-5  | Figure S3. NMR Spectra of compound <b>1a</b>                        |
| S-6  | Figure S4. NMR Spectra of compound <b>1b</b>                        |
| S-7  | Figure S5. NMR Spectra of compound <b>1c</b>                        |
| S-8  | Figure S6. NMR Spectra of compound <b>1d</b>                        |
| S-9  | Figure S7. HRMS Spectra of compound <b>10</b>                       |
| S-10 | Figure S8. HRMS Spectra of compound <b>11</b>                       |
| S-11 | Figure S9. HRMS Spectra of compound <b>1a</b>                       |
| S-12 | Figure S10. HRMS Spectra of compound <b>1b</b>                      |
| S-13 | Figure S11. HRMS Spectra of compound <b>1c</b>                      |
| S-14 | Figure S12. HRMS Spectra of compound <b>1d</b>                      |

To whom correspondence should be addressed: Phone: +8613858036095. E-mail: hnzzcyl@hotmail.com (Yanli Cui); E-mail: xiachengfeng@mail.kib.ac.cn (Chengfeng Xia ); E-mail: yongmin.zhang@ipcm.upmc.fr (Yongmin Zhang).

## The synthetic procedures of compound **5** and compound **6**

**(2R, 3R, 4Z)-1, 3-O-benzylidene-4-octadecene-1, 2, 3-triol (5).** A solution of *n*-BuLi (6.4 g, 56.8 mmol) in THF (20 mL) was added to the stirred solution of  $\text{CH}_3(\text{CH}_2)_{12}\text{CH}_2^+\text{PPh}_3\text{Br}^-$  (17.5 g, 32.4 mmol) in THF (100 mL) at 0 °C under an argon atmosphere. After the mixture had been stirred for 30 min, **4** (5.0 g, 24.0 mmol) in THF (30 mL) was added at 0 °C. The mixture was warmed gradually to room temperature and stirred overnight, quenched by sat.  $\text{NH}_4\text{Cl}$  then extracted with  $\text{CH}_2\text{Cl}_2$ . The organic layer was washed with brine, dried ( $\text{MgSO}_4$ ). The residue was filtered and the filtrate was evaporated. The residue was purified by column chromatography (100%  $\text{CH}_2\text{Cl}_2$ ) to afford **5** as a white solid (4.76 g, 51%).  $R_f$ =0.32 (100% dichloromethane). ESI/MS ( $m/z$ ) 389.3 [ $\text{M} + \text{H}$ ]<sup>+</sup>.

**(2S,3R,4Z)-2-Azido-1,3-O-benzylidene-4-octadecene-1,3-diol (6).** Anhydride Triflate (2.24 mL) was added dropwise to a solution of **5** (4.0 g, 10.43 mmol) in  $\text{CH}_2\text{Cl}_2$  (40.0 mL) and pyridine (2.0 mL) at -15 °C under argon atmosphere. The solution was warmed gradually to room temperature and stirred for 2 h before DMF (20mL) and sodium azide (3.4 g, 52.1 mmol) was added successively. Then the mixture was stirred overnight. After the organic solvent was removed in vacuum, the residue was partitioned between ice-water and  $\text{CH}_2\text{Cl}_2$ . The organic layer was washed with water and brine successively, dried ( $\text{MgSO}_4$ ) and evaporated. The residue was purified by column chromatography (petroleum ether/ ethyl acetate 40:1) to afford **6** as a white solid (2.64 g, 62%).  $R_f$ = 0.27 (petroleum ether/ ethyl acetate 40:1). ESI/MS ( $m/z$ ) 414.3 [ $\text{M} + \text{H}$ ]<sup>+</sup>.

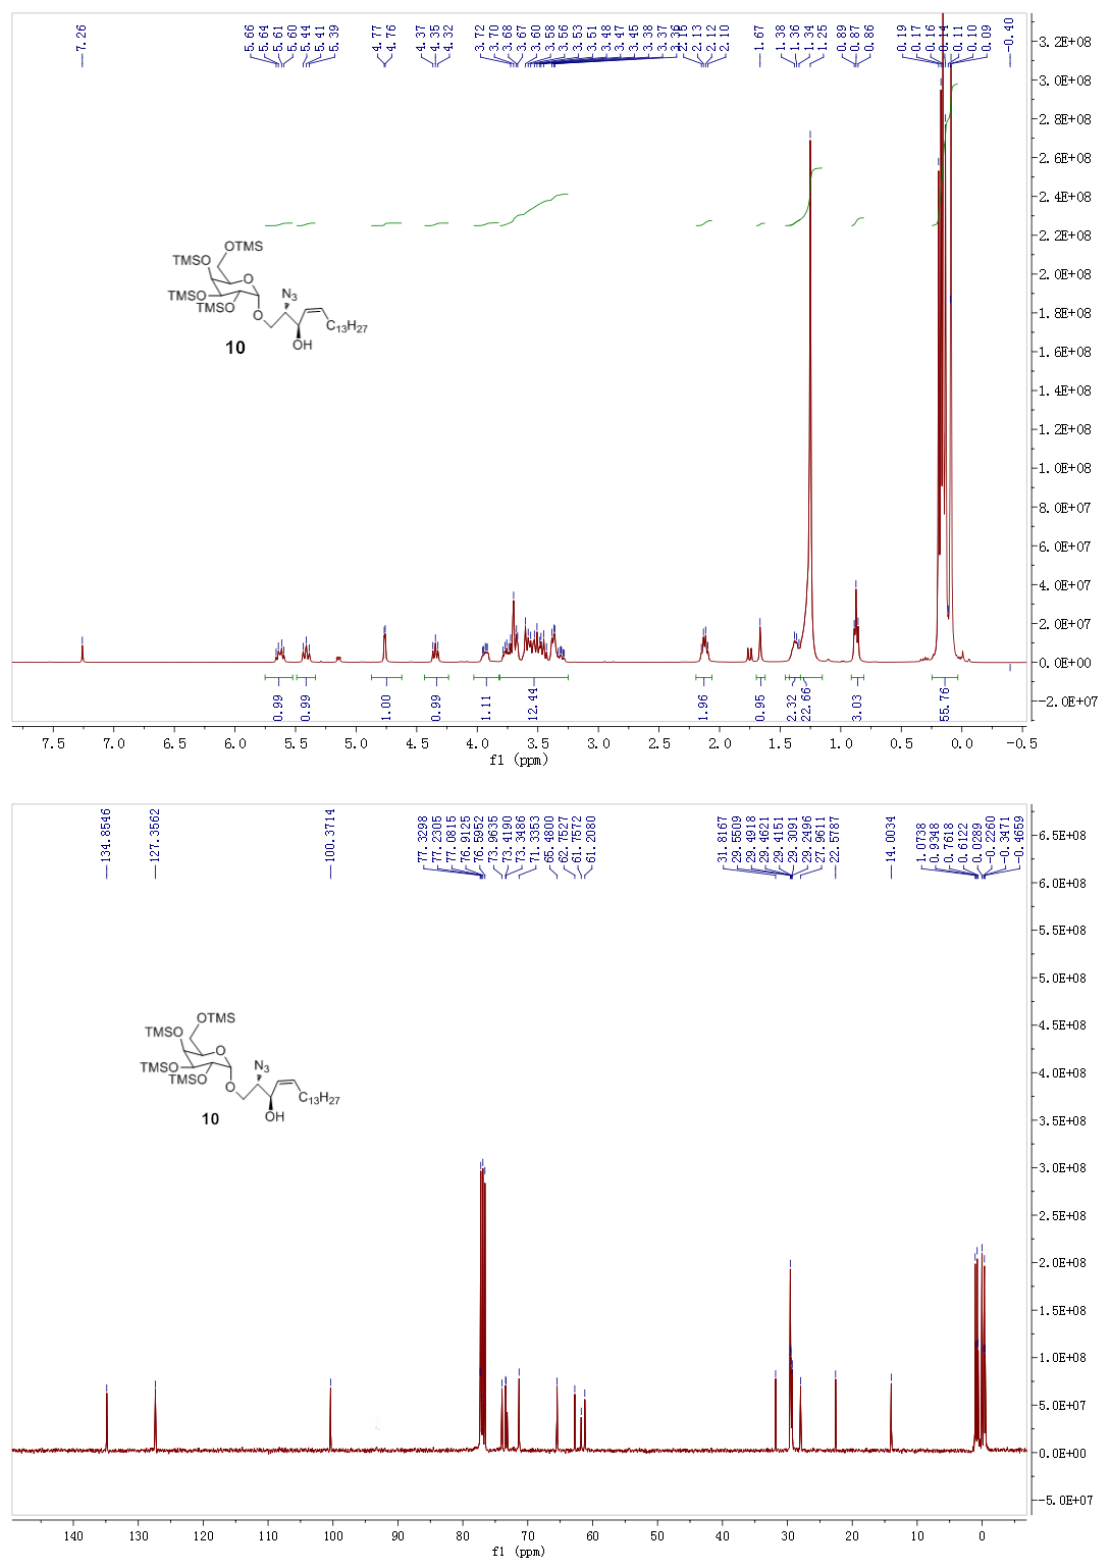

Figure S1. NMR Spectra of compound **10**

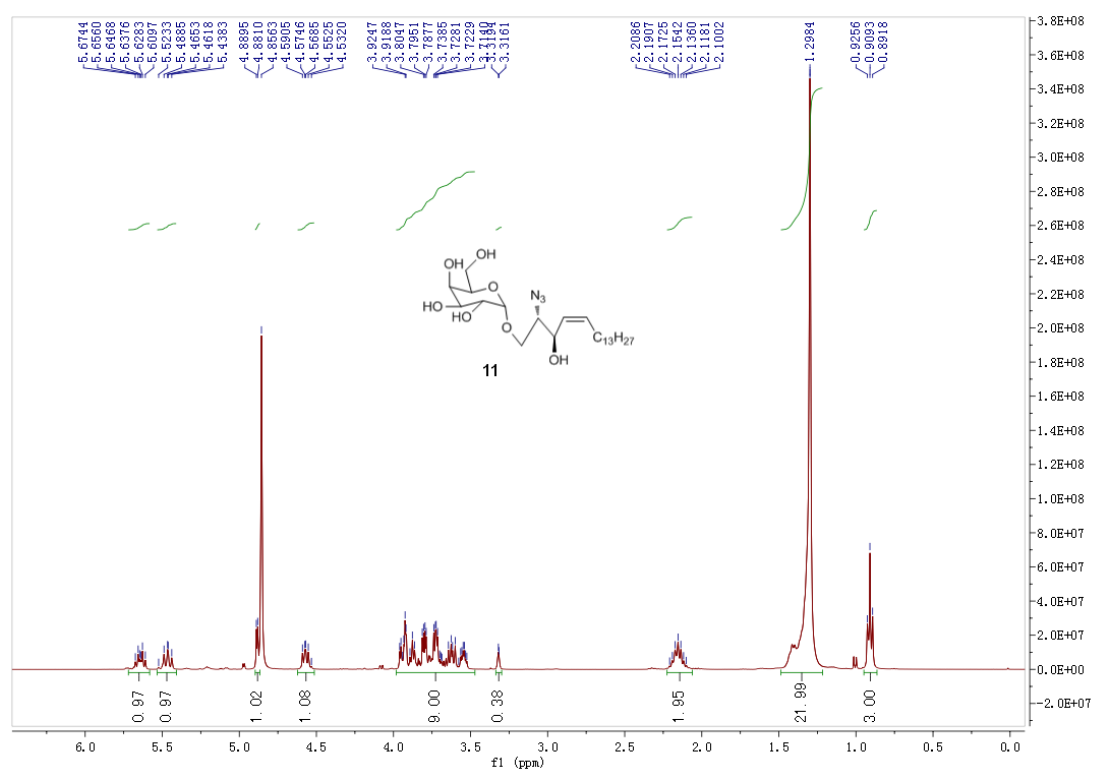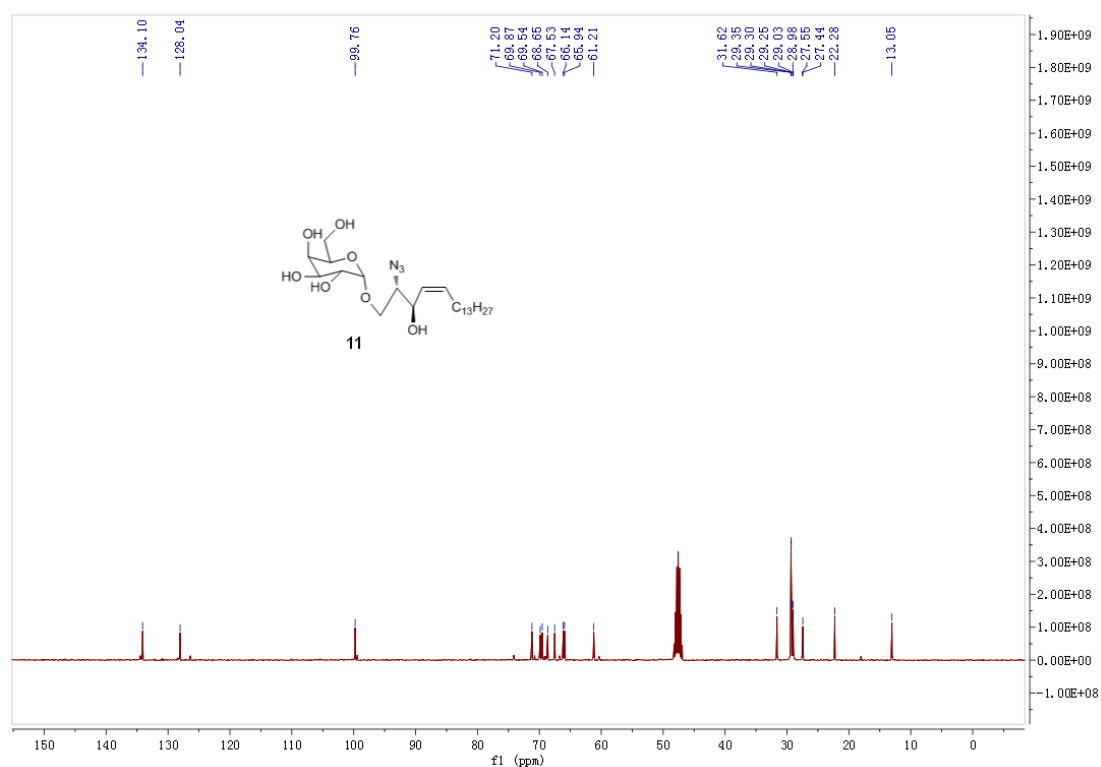

Figure S2. NMR Spectra of compound **11**

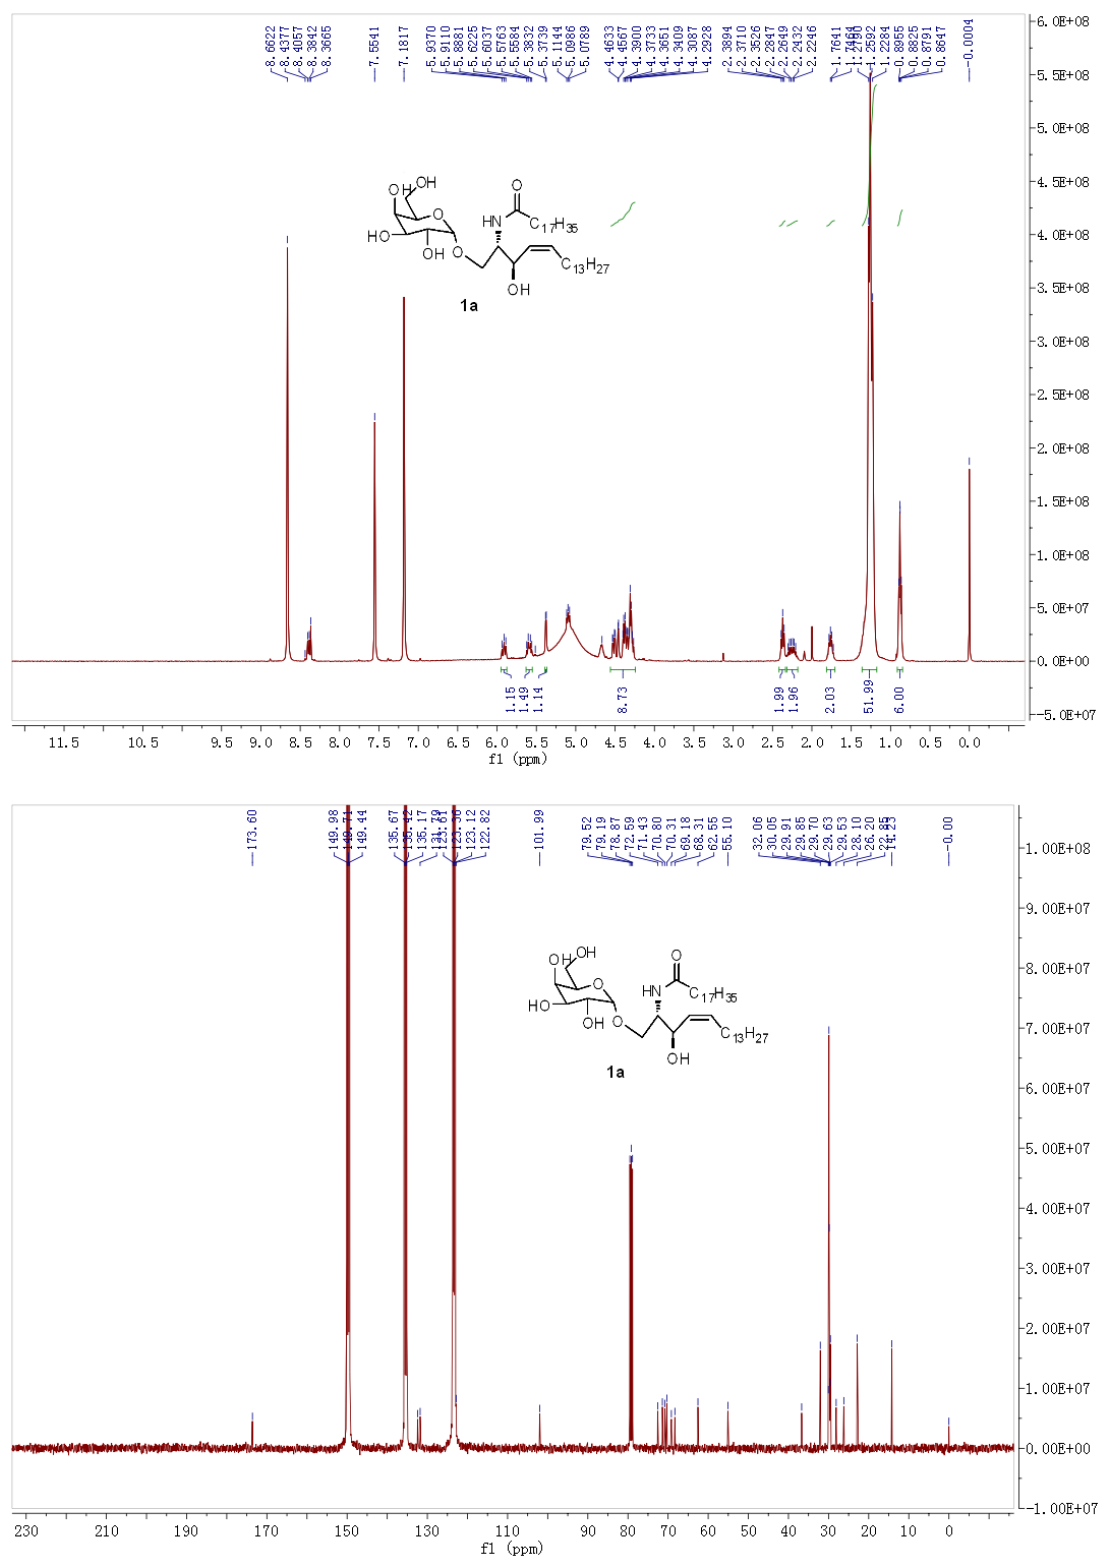

Figure S3. NMR Spectra of compound **1a**

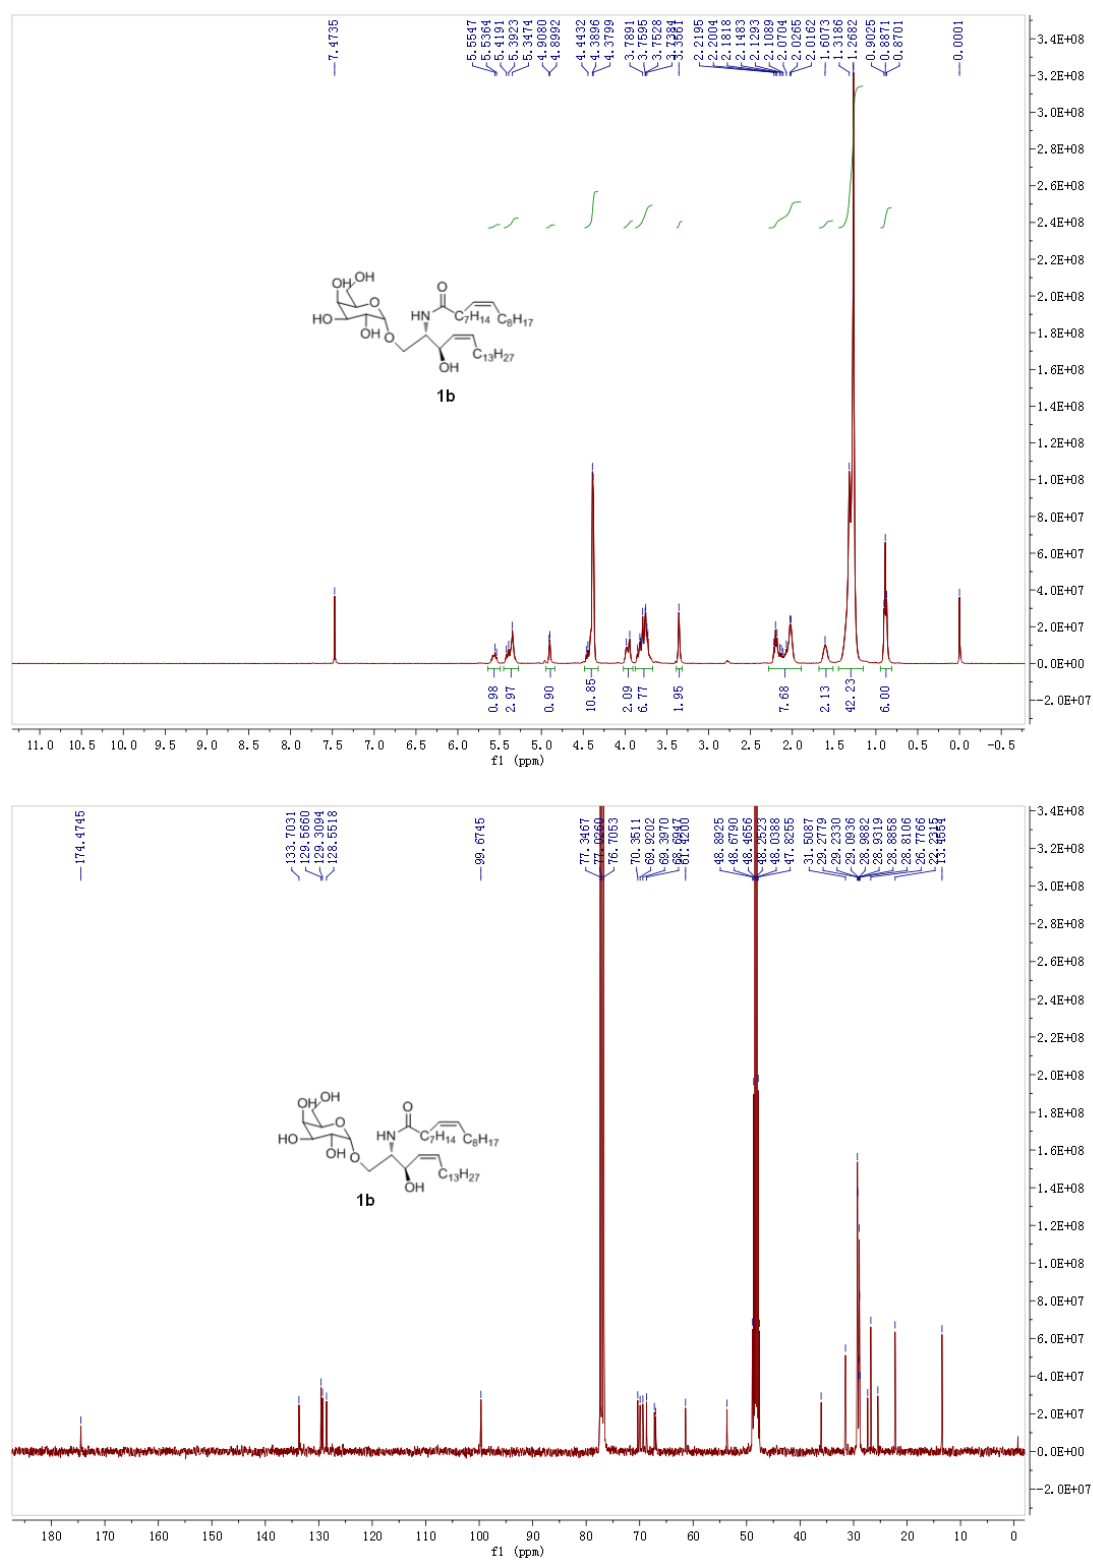

Figure S4. NMR Spectra of compound **1b**

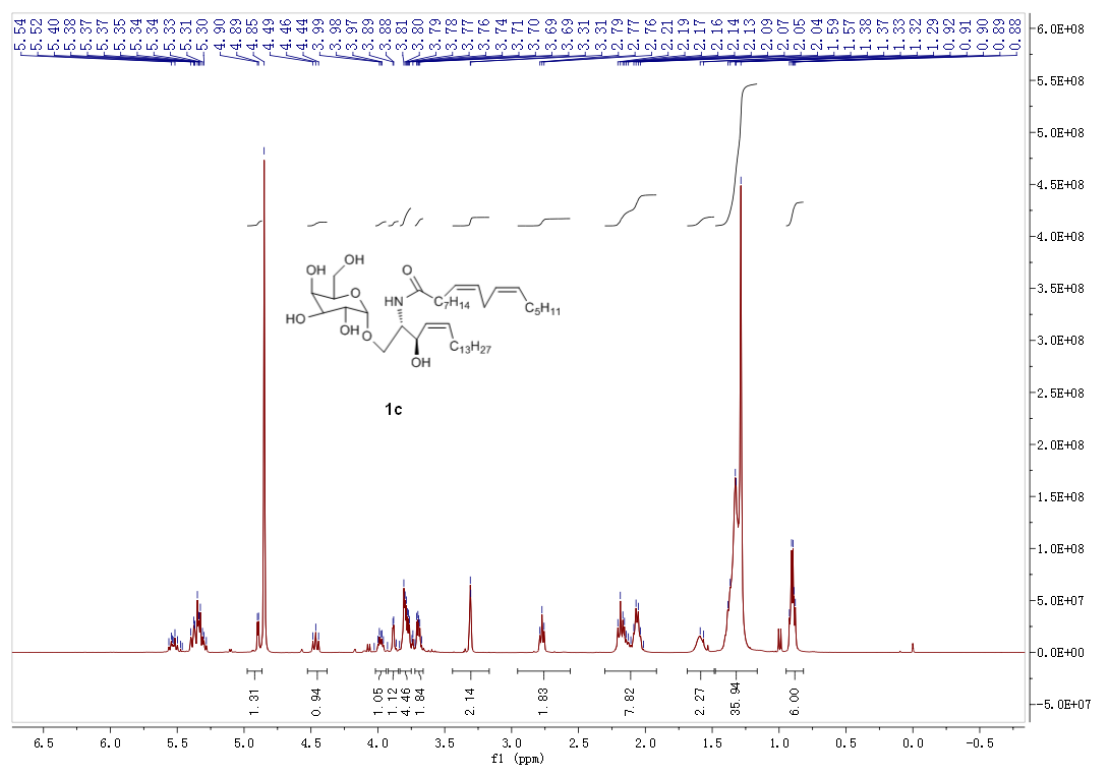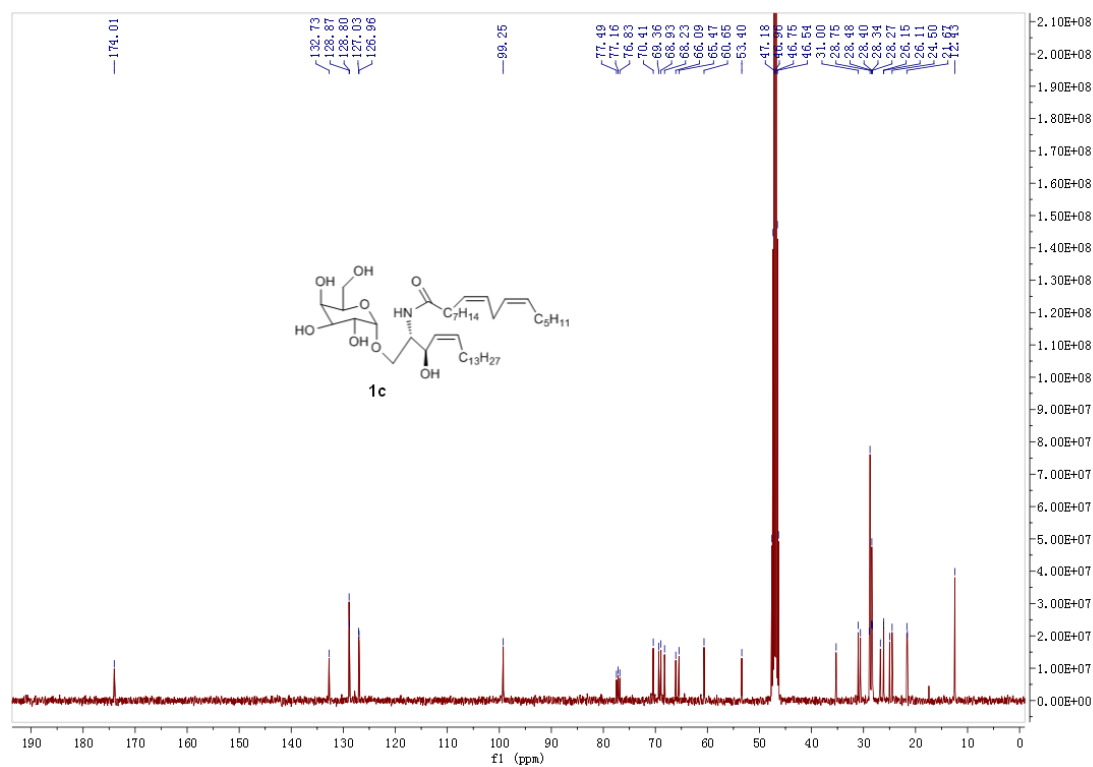

Figure S5. NMR Spectra of compound 1c

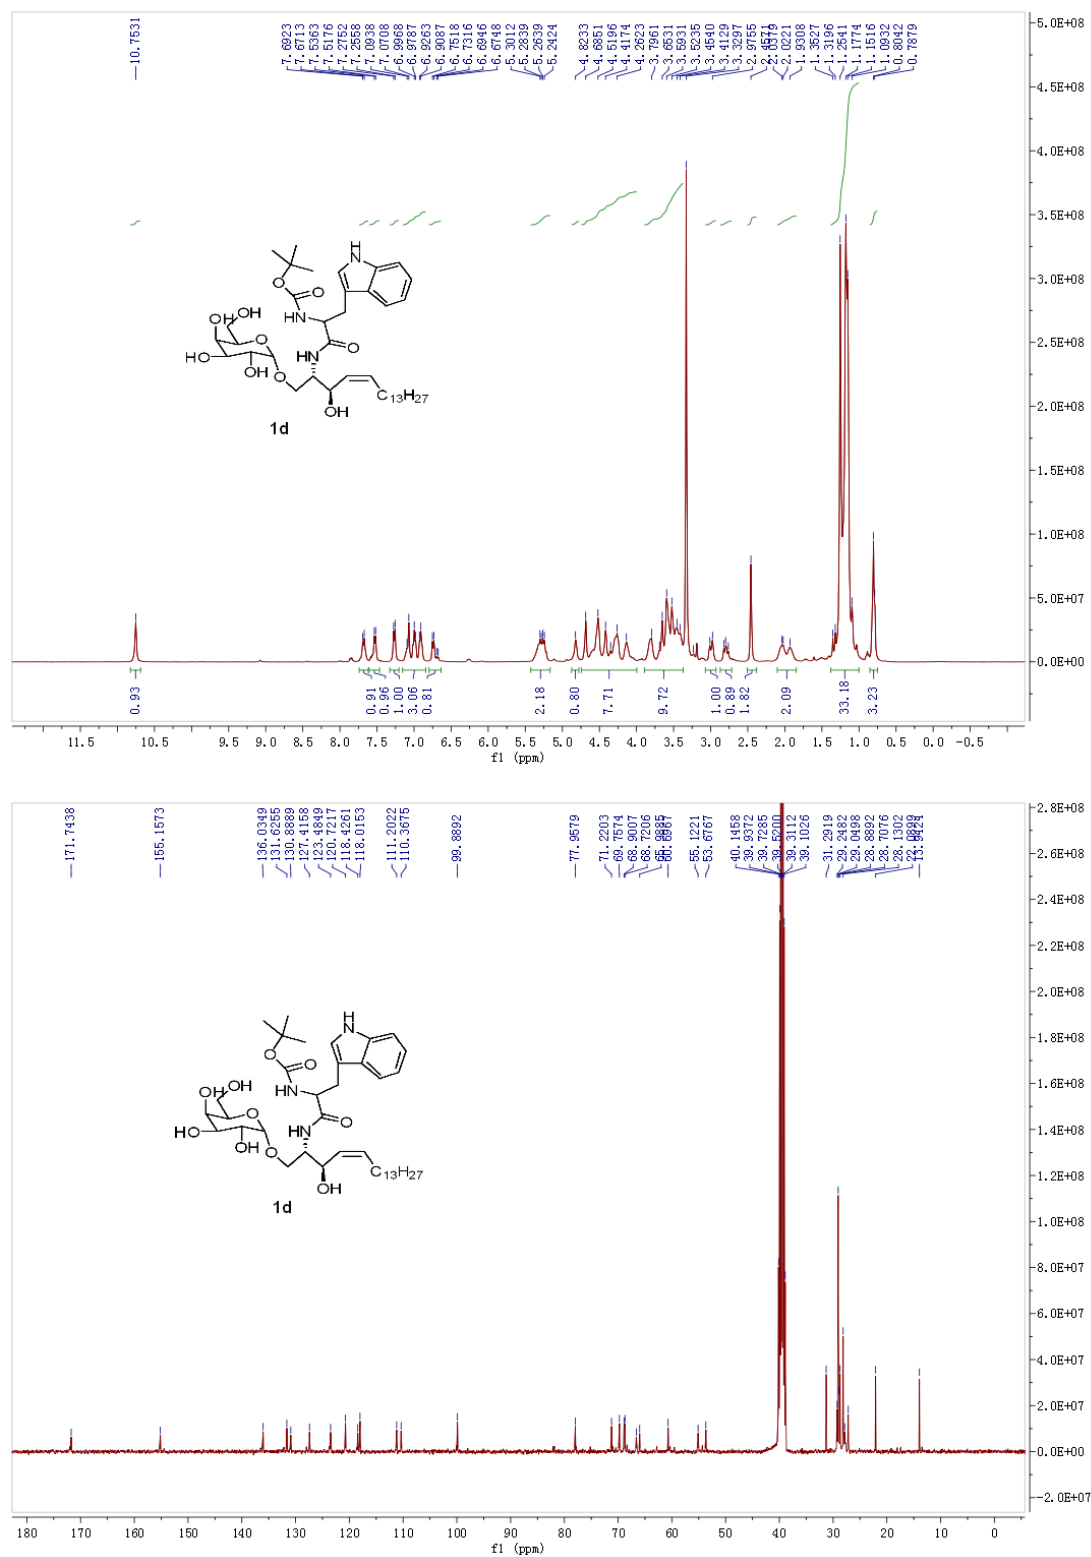

Figure S6. NMR Spectra of compound **1d**



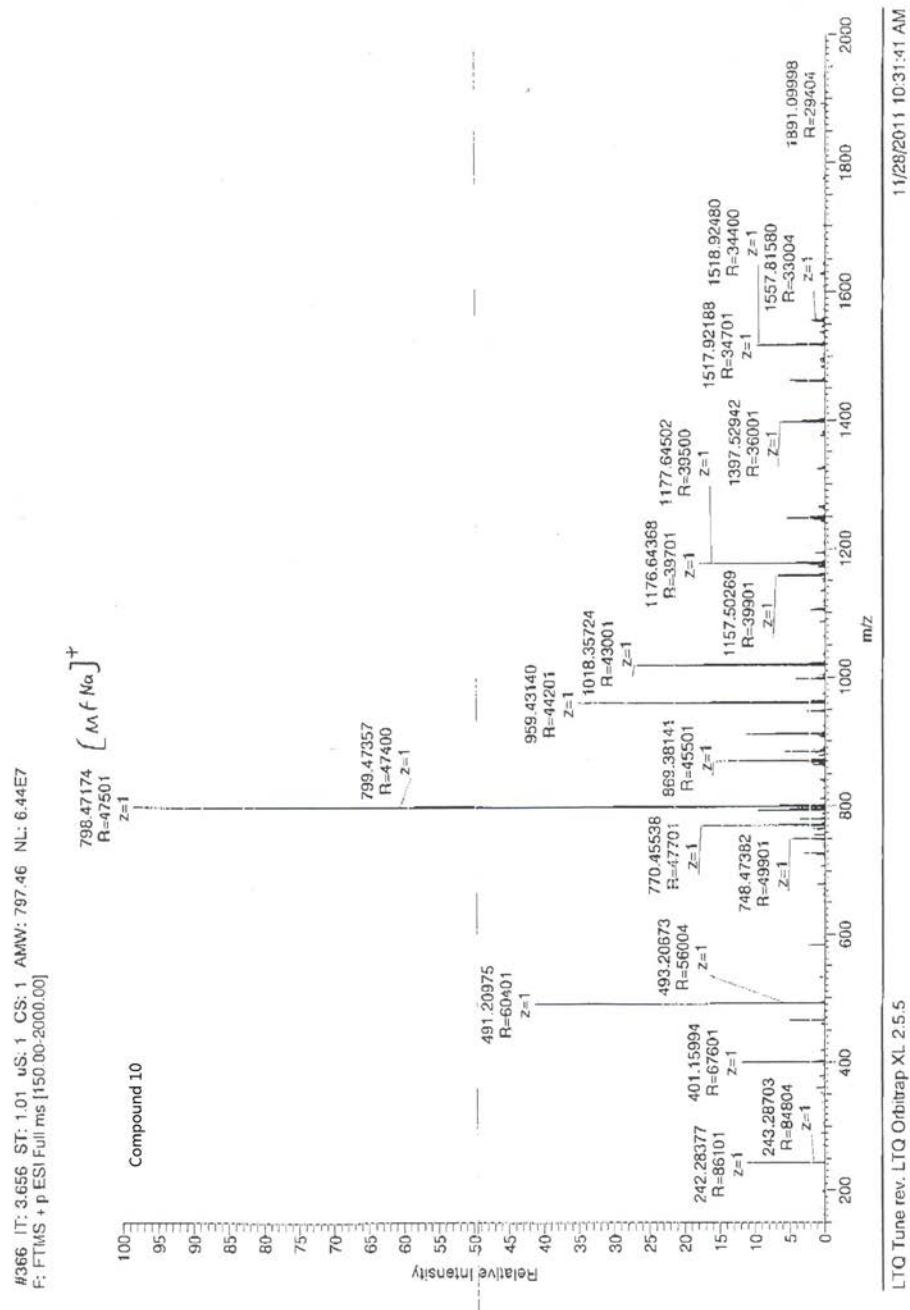

Figure S7. HRMS Spectra of compound 10

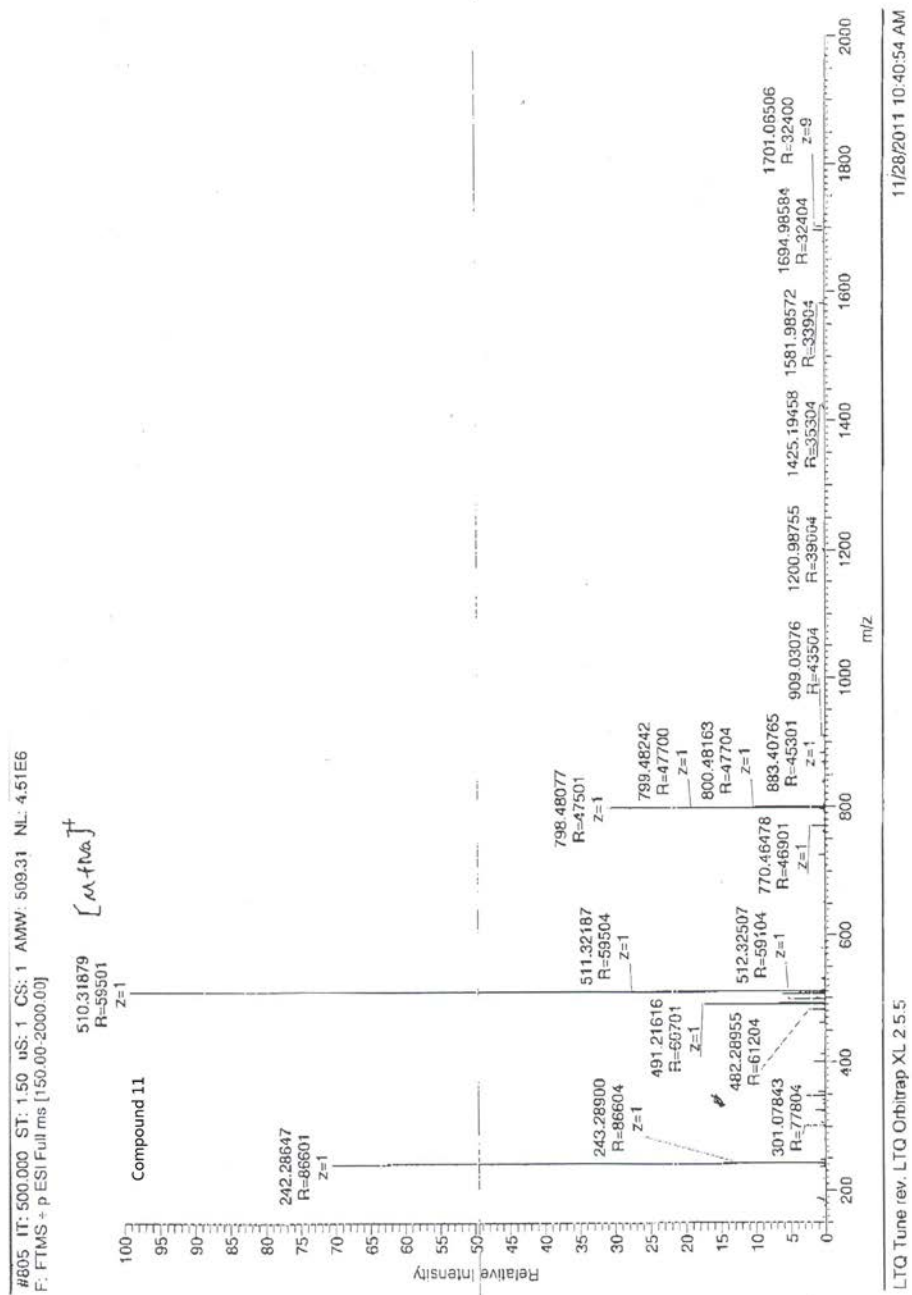

Figure S8. HRMS Spectra of compound **11**

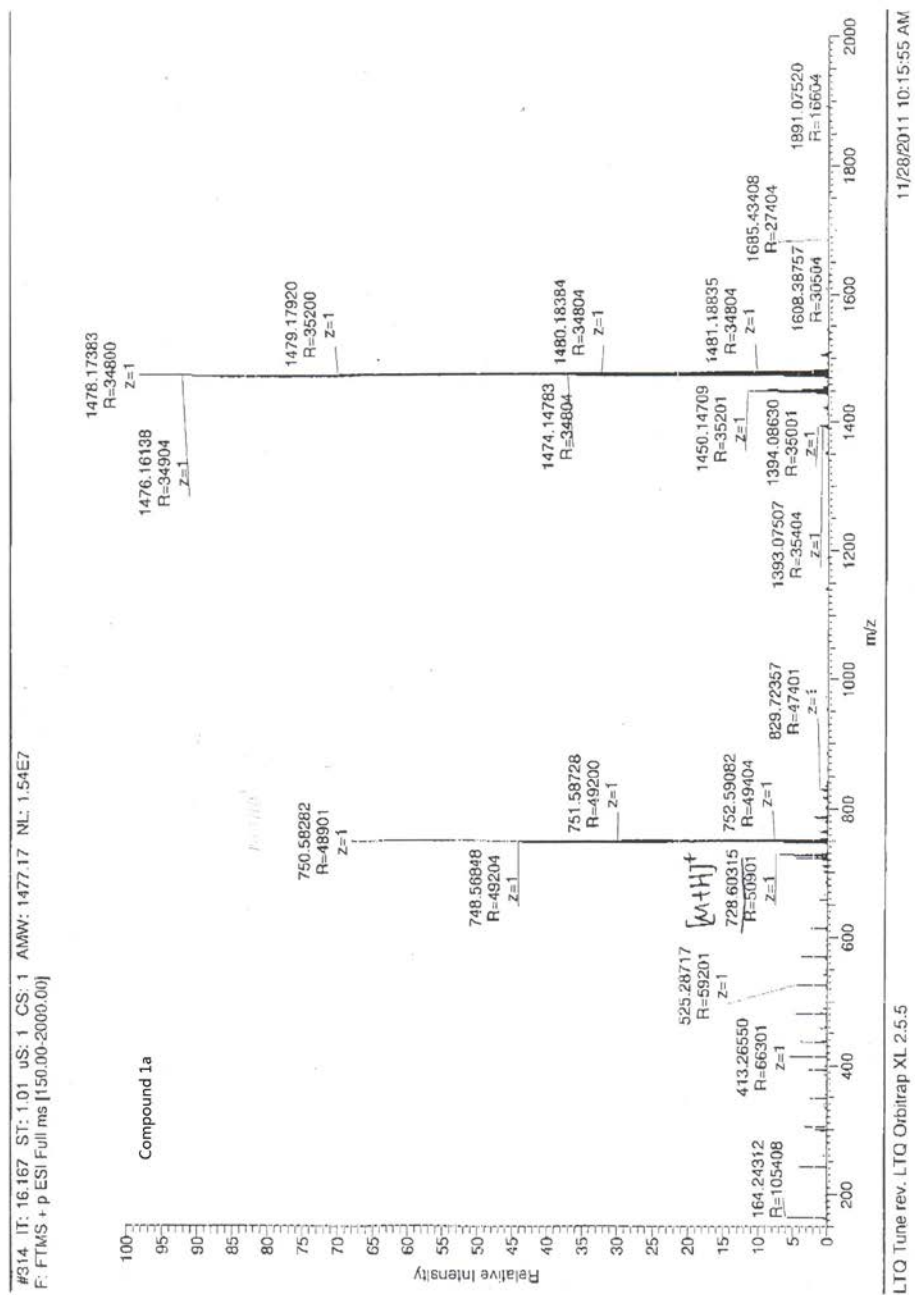

Figure S9. HRMS Spectra of compound **1a**

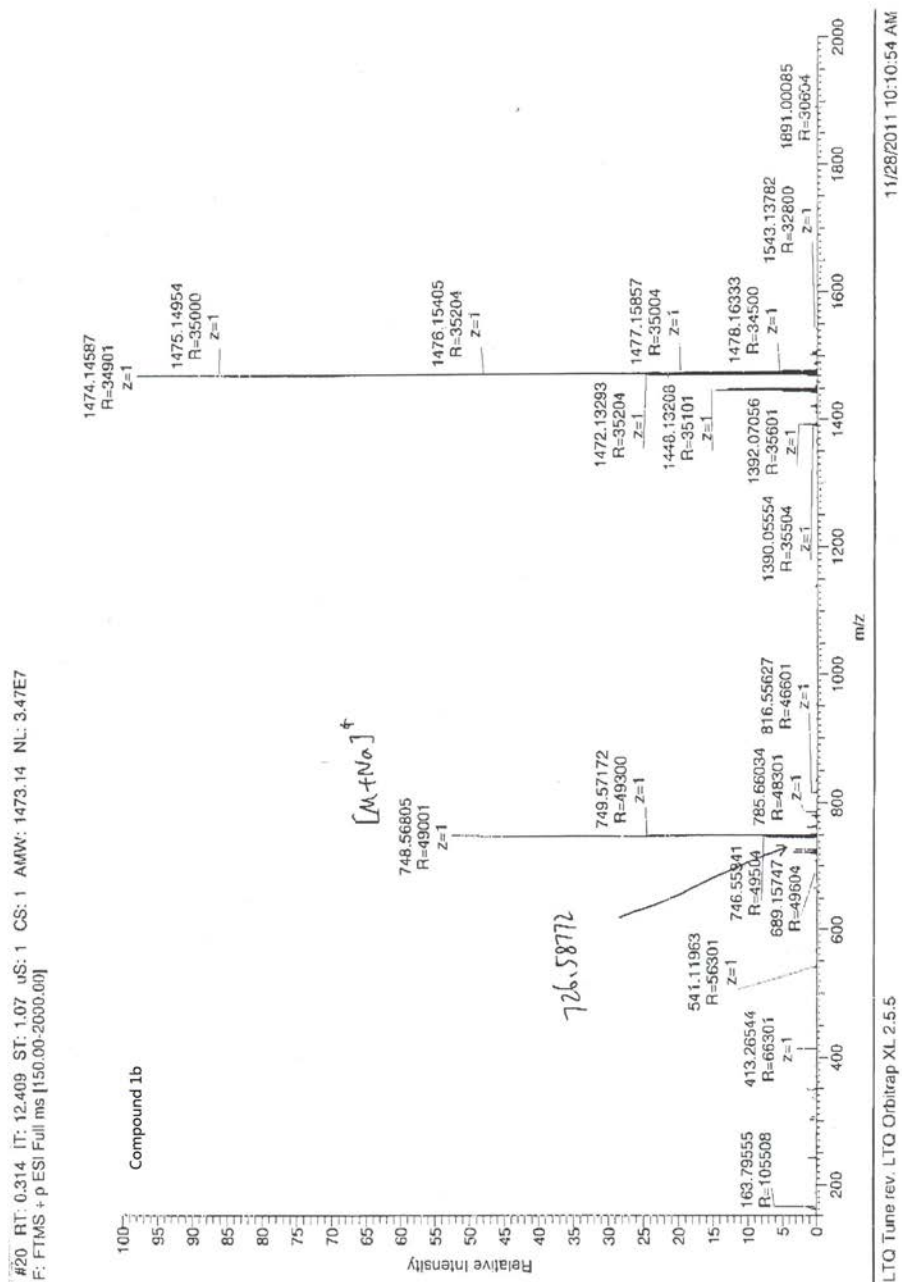

Figure S10. HRMS Spectra of compound **1b**

#226 IT: 14.452 ST: 1.01 uS: 1 CS: 1 AMW: 1469.11 NL: 1.50E7  
F: FTMS + p ESI Full ms [150.00-2000.00]

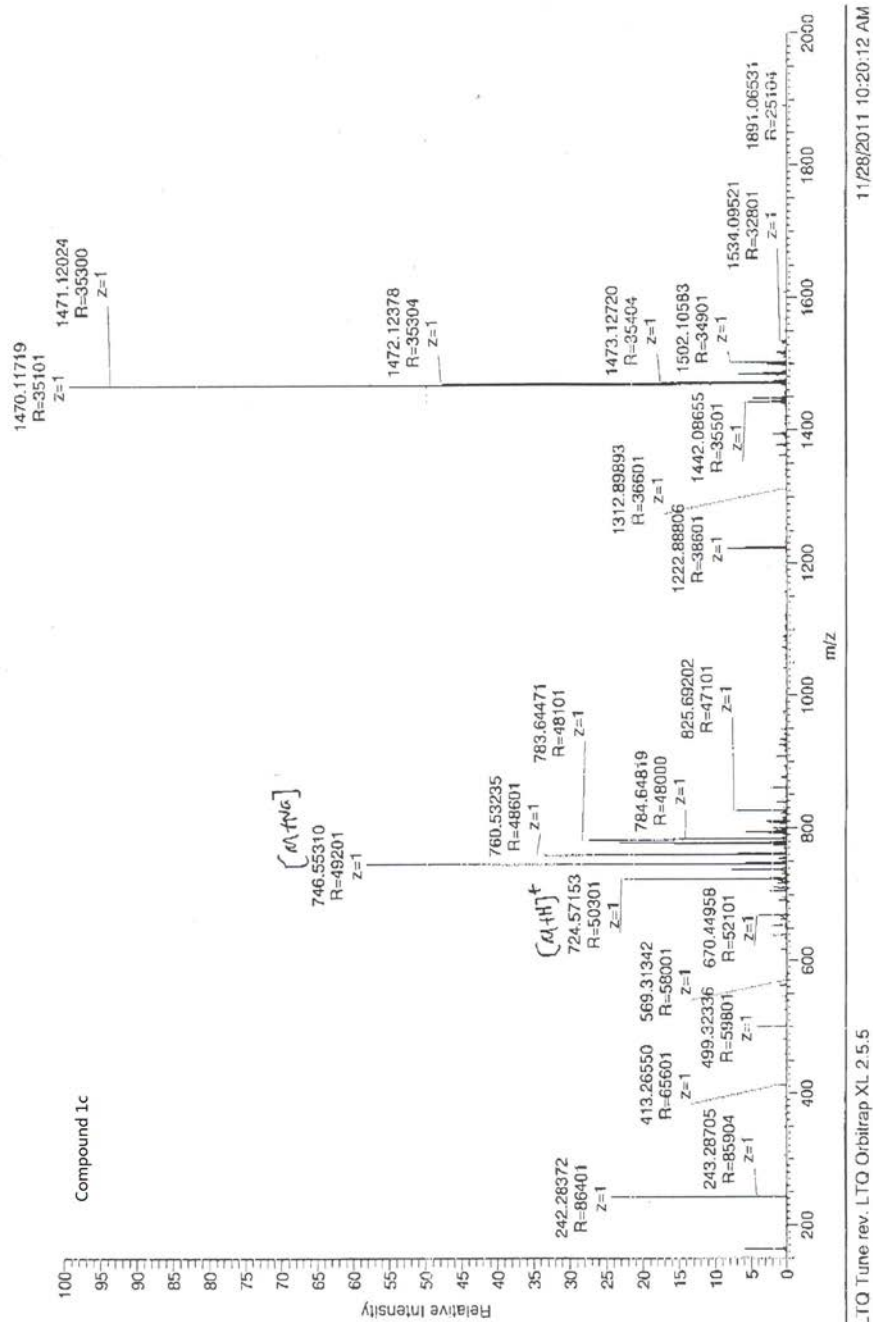

Figure S11. HRMS Spectra of compound 1c

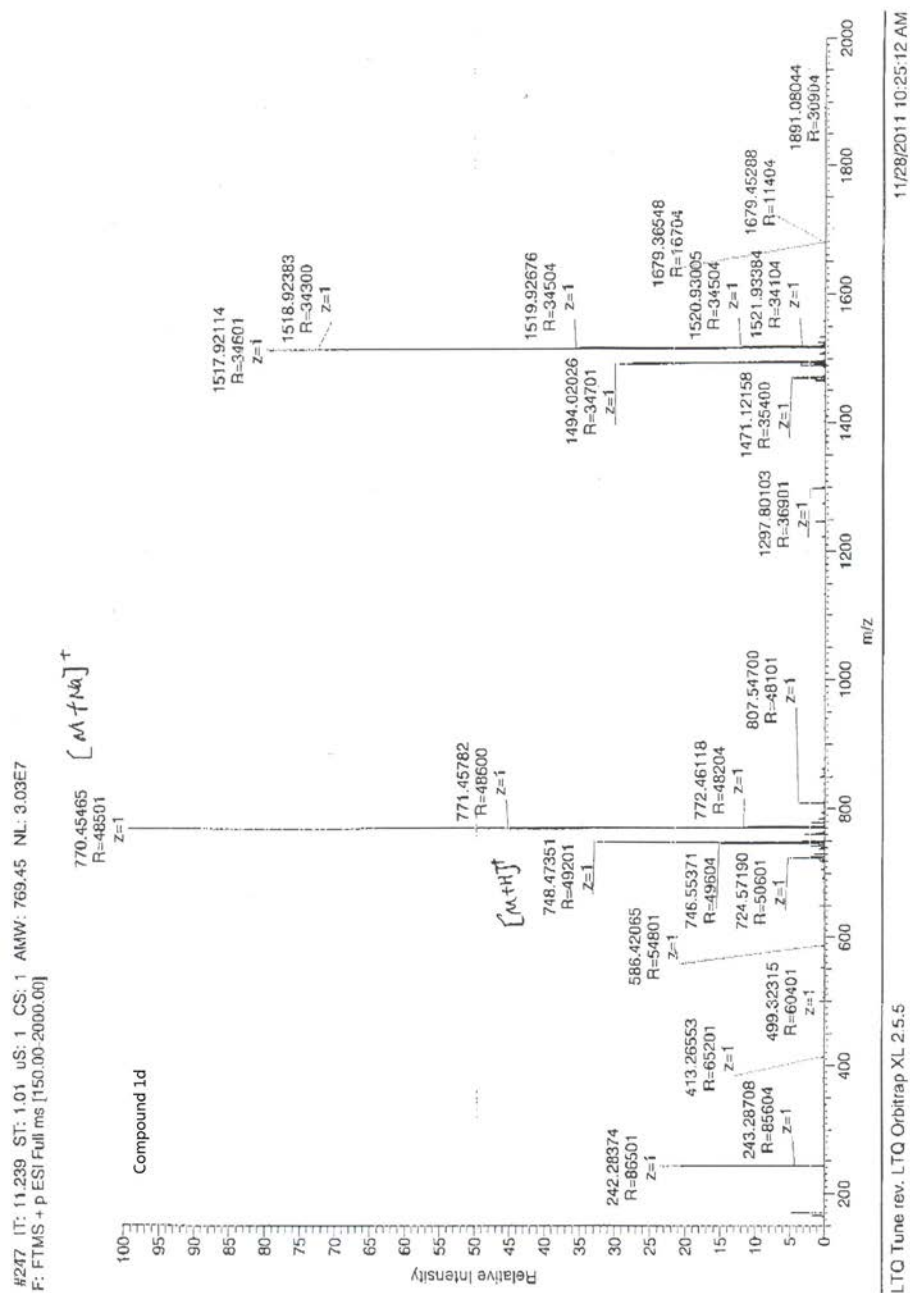

Figure S12. HRMS Spectra of compound 1d
